# Supplementary material for: The Pharmacokinetics in Mice and Cell Uptake of Thymus Immunosuppressive Pentapeptide Using LC-MS/MS Analysis
Source: MDPI journal article supplement (doi:10.3390/molecules27134256), 2022-07-01
Supplement: s1 [file s1]

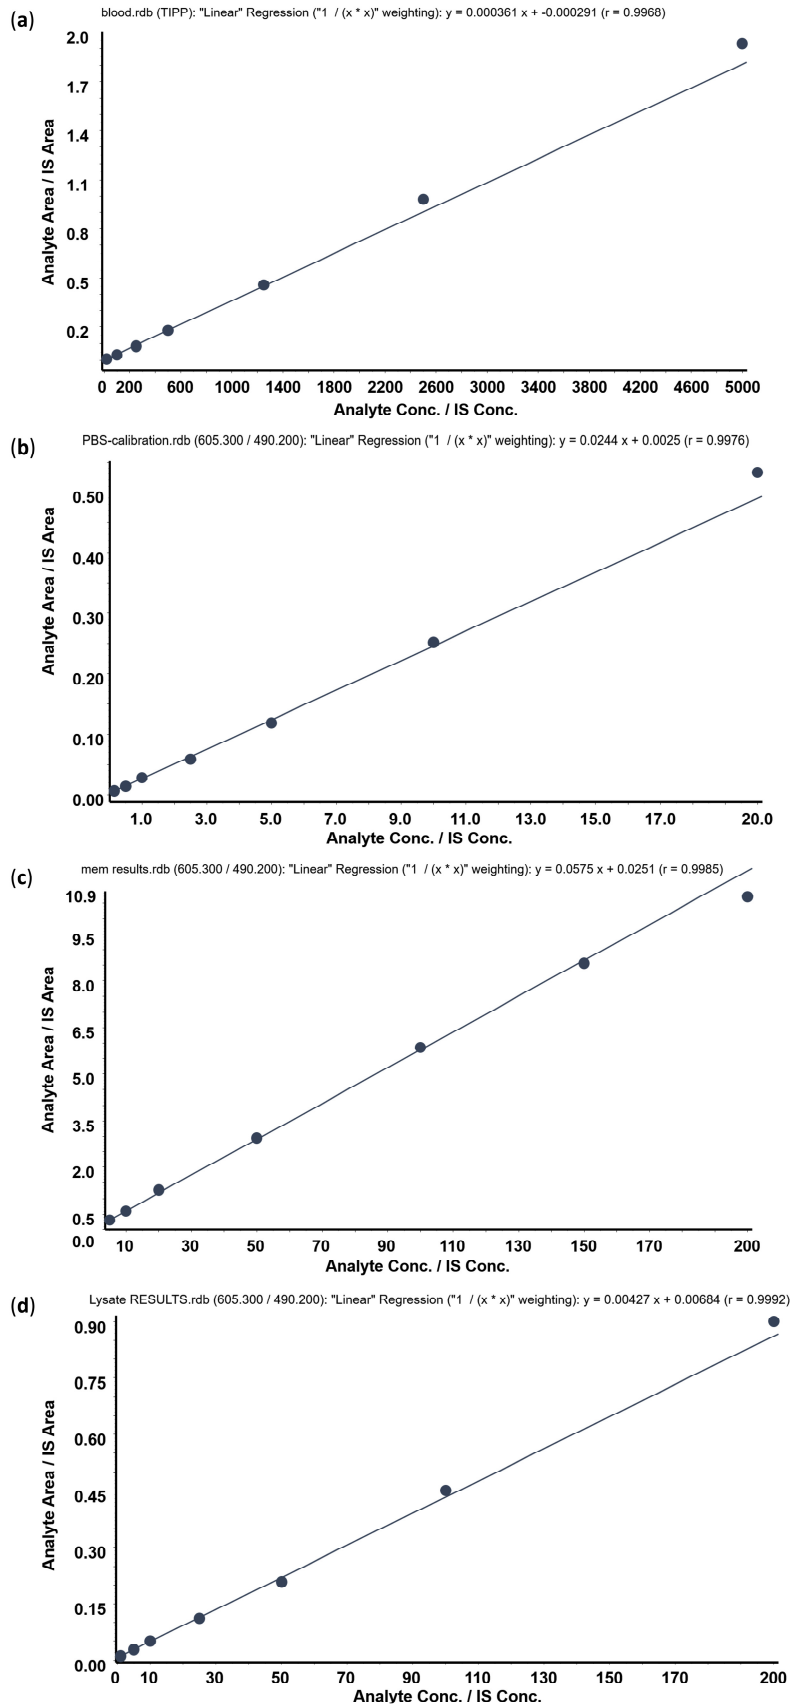

**Figure S1.** TIPP calibration curve and linearity. Linear calibration fit for TIPP in murine plasma (a), the final cell rinse (b), cell supernatants (c), and cell lysates (d).
